# Supplementary material
Source: publisher site journal article supplement (https://www.spandidos-publications.com/5109/downloadSupplementary)
Supplement: Supplementary file 2 [file downloadSupplementary]

## Sheet: Table S12
Table SXII. The correlation of DNase expression and the immune score in different cancer types.
Cancer type	DNASE1	DNASE1L1	DNASE1L2	DNASE1L3	DNASE2	DNASE2B
ACC	-0.274367	-0.0591042	-0.562366	0.367235	-0.0455453	0.0919854
BLCA	-0.285278	0.047554	-0.314664	0.539521	0.146663	0.060258
BRCA	-0.167452	0.118074	-0.143324	0.512433	0.102081	0.17875
CESC	-0.163237	0.0171385	-0.186957	0.386097	0.175026	0.239433
CHOL	-0.180438	0.0957529	-0.0118404	0.307336	0.0746461	0.381749
COAD	-0.257012	-0.101715	-0.0645227	0.373885	0.265507	0.026754
DLBC	-0.255319	0.335432	-0.511724	0.505536	0.6066	0.466095
ESCA	0.0716932	-0.0017712	-0.024036	0.169776	0.119486	0.270233
GBM	-0.482056	0.599012	-0.300211	0.230254	0.629201	0.0686041
HNSC	-0.0278284	-0.0234111	0.00727377	0.353994	0.138051	0.366474
KICH	0.00297203	-0.265997	-0.263243	0.378584	-0.095979	0.329409
KIRC	-0.0469844	0.0350647	-0.046965	-0.0227797	0.398141	0.42279
KIRP	-0.284796	0.0395552	-0.191271	0.390877	0.571466	0.596266
LAML	-0.104315	0.551356	-0.112259	0.203611	0.0798919	-0.151596
LGG	-0.240445	0.384141	-0.172322	0.13174	0.629368	0.457171
LIHC	0.00277501	0.0681614	-0.170365	0.126734	0.0782398	0.337762
LUAD	-0.142134	0.149832	0.0221235	0.414376	0.426267	0.489738
LUSC	-0.14502	0.202817	-0.0580778	0.137299	0.163804	0.493915
MESO	-0.419067	0.127015	0.0291618	0.448759	0.161847	0.461406
OV	-0.223742	0.277441	-0.0765136	0.451207	0.145206	0.261483
PAAD	-0.185726	-0.198754	-0.356368	0.554064	0.199735	0.42585
PCPG	-0.360096	-0.159337	-0.0810684	0.337348	0.00453894	0.334081
PRAD	-0.17996	-0.192081	0.00511162	0.679837	0.29157	-0.254748
READ	-0.260373	0.203423	0.0246478	0.425005	0.227607	0.0306564
SARC	-0.470263	0.240252	-0.153928	0.381491	0.405474	0.268617
SKCM	-0.0998042	0.11014	-0.0612174	0.608733	0.305286	0.144634
STAD	-0.144836	0.0552004	-0.184944	0.487027	0.363594	0.322857
TGCT	-0.035163	0.150075	-0.184227	0.739366	0.705448	0.689131
THCA	-0.14607	-0.203933	-0.157231	-0.203318	-0.302891	0.400736
THYM	-0.125196	-0.0708802	0.199551	0.618053	-0.195051	0.0790804
UCEC	-0.0884146	0.0398422	0.0137996	0.535585	0.0412092	0.219234
UCS	-0.325222	0.265892	-0.221668	0.317293	0.322761	0.101658
UVM	-0.19571	0.191397	0.0394524	0.63978	0.56376	0.498187
